# Supplementary material
Source: PubMed Central journal article supplement (PMC7259940)
Supplement: NIHMS1590333-supplement-Appendix.pdf [file NIHMS1590333-supplement-Appendix.pdf]

**APPENDIX**

**Table 1. Racial/ethnic difference in wait time and satisfaction: by Age group <sup>(a)</sup>**

| Dependent variables:<br>VARIABLES | Satisfaction: Very good |          |         | Patient-reported post-scheduled time at waiting area |          |         |
|-----------------------------------|-------------------------|----------|---------|------------------------------------------------------|----------|---------|
|                                   | Overall                 | Age 0-17 | Age 18+ | Overall                                              | Age 0-17 | Age 18+ |
| R/E (ref=NHW)                     |                         |          |         |                                                      |          |         |
| Hispanic/Latino                   | 0.96                    | 1.00     | 0.94    | 0.86**                                               | 0.54     | 0.93**  |
| Black                             | 0.86                    | 1.03     | 0.84    | 0.80*                                                | -1.06    | 1.01**  |
| Chinese                           | 0.50**                  | 0.50**   | 0.50**  | 1.09**                                               | 0.93**   | 1.11**  |
| Asian Indian                      | 0.46**                  | 0.41**   | 0.49**  | 1.79**                                               | 1.70**   | 1.80**  |
| Filipino                          | 0.58**                  | 0.56**   | 0.59**  | 1.92**                                               | 1.66**   | 1.97**  |
| Japanese                          | 0.62**                  | 0.54*    | 0.62**  | 0.029                                                | -0.48    | 0.13    |
| Korean                            | 0.51**                  | 0.53**   | 0.50**  | 0.89                                                 | -0.15    | 1.41*   |
| Vietnamese                        | 0.56**                  | 0.47**   | 0.58**  | 2.15**                                               | 2.89**   | 2.00**  |
| Observations                      | 70,806                  | 12,253   | 58,535  | 77,817                                               | 13,467   | 64,350  |
| No. providers                     | 833                     | 390      | 754     | 856                                                  | 443      | 781     |

\*\* p<0.001, \* p<0.01

(a) Estimates from multivariate regression with provider random effects. Also included in the model but are not reported in the table are all the covariates in main Table 2.

**Table 2. Racial/ethnic difference in wait time and satisfaction: provider fixed effects model <sup>(a)</sup>**

| VARIABLES       | Dependent variables: | Satisfaction: Very good | Patient-reported post-scheduled time at waiting area |
|-----------------|----------------------|-------------------------|------------------------------------------------------|
|                 |                      | Odds Ratio              | Coefficient (min)                                    |
| R/E (ref=NHW)   |                      |                         |                                                      |
| Hispanic/Latino |                      | 0.97                    | 0.83**                                               |
| Black           |                      | 0.87                    | 0.71*                                                |
| Chinese         |                      | 0.51**                  | 1.04**                                               |
| Asian Indian    |                      | 0.47**                  | 1.77**                                               |
| Filipino        |                      | 0.59**                  | 1.90**                                               |
| Japanese        |                      | 0.62**                  | 0.040                                                |
| Korean          |                      | 0.52**                  | 0.87                                                 |
| Vietnamese      |                      | 0.55**                  | 1.97**                                               |
| Constant        |                      |                         | 5.32**                                               |
| Observations    |                      | 74,376                  | 83,064                                               |
| No. providers   |                      | 874                     | 962                                                  |

\*\* p<0.001, \* p<0.01

(a) Estimates from multivariate regression with provider fixed effects. Also included in the model but are not reported in the table are all the covariates (except for provider-specific variables) in main Table 2.

**Table 3. R/E difference in wait time and satisfaction: R/E interaction with wait time <sup>(a)</sup>**

| Dependent variable:                              | Satisfaction: Very good |                        |                    | Patient-reported post-scheduled time at waiting area |                        |                    |
|--------------------------------------------------|-------------------------|------------------------|--------------------|------------------------------------------------------|------------------------|--------------------|
|                                                  | Overall                 | Waited for 15+ minutes | Waited <15 minutes | Overall                                              | Waited for 15+ minutes | Waited <15 minutes |
| <b>VARIABLES</b>                                 |                         |                        |                    |                                                      |                        |                    |
| EHR time at waiting area (/10minute)             | 0.82**                  | 0.73**                 | 0.95**             | 2.08**                                               | 1.85**                 | 1.20**             |
| <b>R/E (Ref: NHW) x EHR time at waiting area</b> |                         |                        |                    |                                                      |                        |                    |
| Hispanic/Latino                                  | 1.05                    |                        |                    | -0.31*                                               |                        |                    |
| Black                                            | 1.11                    |                        |                    | -0.096                                               |                        |                    |
| Chinese                                          | 1.05                    |                        |                    | -0.067                                               |                        |                    |
| Asian Indian                                     | 0.95                    |                        |                    | -0.41*                                               |                        |                    |
| Filipino                                         | 1.05                    |                        |                    | -0.25                                                |                        |                    |
| Japanese                                         | 1.04                    |                        |                    | -0.44                                                |                        |                    |
| Korean                                           | 1.04                    |                        |                    | -0.67                                                |                        |                    |
| Vietnamese                                       | 1.12                    |                        |                    | -1.54**                                              |                        |                    |
| <b>R/E (ref: NHW)</b>                            |                         |                        |                    |                                                      |                        |                    |
| Latino                                           | 0.92                    | 0.92                   | 1.13               | 1.14**                                               | 1.14**                 | -0.21              |
| Black                                            | 0.78*                   | 0.80*                  | 1.11               | 0.89                                                 | 0.82*                  | 0.59               |
| Chinese                                          | 0.48**                  | 0.49**                 | 0.52**             | 1.15**                                               | 1.11**                 | 1.30*              |
| Asian Indian                                     | 0.48**                  | 0.46**                 | 0.45**             | 2.16**                                               | 1.98**                 | 0.94               |
| Filipino                                         | 0.56**                  | 0.58**                 | 0.60**             | 2.13**                                               | 2.05**                 | 1.48               |
| Japanese                                         | 0.60**                  | 0.61**                 | 0.61*              | 0.42                                                 | 0.066                  | -0.058             |
| Korean                                           | 0.49**                  | 0.50**                 | 0.50*              | 1.45*                                                | 1.22**                 | -0.28              |
| Vietnamese                                       | 0.51**                  | 0.54**                 | 0.59               | 3.58**                                               | 2.59**                 | 0.65               |
| Observations                                     | 70,806                  | 56,893                 | 13,908             | 77,817                                               | 63,253                 | 14,564             |

\*\* p<0.001, \* p<0.01

(a) Estimates from multivariate regression with provider random effects. Also included in the model but are not reported in the table are all the covariates in main Table 2.

**Table 4. Arrival time relative to scheduled appointment time by RE (row %)**

| race/ethnicity   | N      | 30-120m<br>early | 15-29m<br>early | 5-14m<br>early | 0-4m<br>early | 1-5m late   | 6-15m<br>late | 16-120m<br>late |
|------------------|--------|------------------|-----------------|----------------|---------------|-------------|---------------|-----------------|
| NHW (ref. group) | 80,901 | 5.5              | 18.4            | 34.8           | 19.0          | 12.3        | 7.5           | 2.5             |
| Hispanic/Latino  | 11,323 | <b>6.6</b>       | 17.6            | <b>30.4</b>    | <b>18.0</b>   | <b>13.5</b> | <b>10.5</b>   | <b>3.4</b>      |
| Black            | 1,721  | 8.2              | 18.3            | <b>26.6</b>    | 17.5          | 12.8        | <b>12.1</b>   | <b>4.5</b>      |
| Chinese          | 9,901  | 5.2              | <b>15.6</b>     | <b>30.8</b>    | 19.8          | <b>15.1</b> | <b>10.6</b>   | 2.9             |
| Asian Indian     | 6,774  | <b>4.6</b>       | <b>12.5</b>     | <b>29.0</b>    | 19.8          | <b>18.0</b> | <b>12.5</b>   | <b>3.5</b>      |
| Filipino         | 3,259  | <b>9.3</b>       | <b>20.5</b>     | <b>29.7</b>    | <b>15.7</b>   | 12.0        | <b>9.0</b>    | <b>3.7</b>      |
| Japanese         | 2,068  | 6.4              | <b>20.7</b>     | 37.5           | 18.2          | <b>9.0</b>  | 6.3           | 1.9             |
| Korean           | 894    | 7.1              | 16.0            | <b>29.1</b>    | 21.0          | 13.8        | <b>10.2</b>   | 2.9             |
| Vietnamese       | 740    | <b>7.8</b>       | 15.1            | <b>31.1</b>    | 17.6          | 14.9        | <b>11.6</b>   | 1.9             |

For each arrival time category, statistically significant ( $P < 0.01$ ) difference from NHW is **bold**.
